# Supplementary material for: A Culturomics-Based Bacterial Synthetic Community for Improving Resilience towards Arsenic and Heavy Metals in the Nutraceutical Plant Mesembryanthemum crystallinum
Source: MDPI journal article supplement (doi:10.3390/ijms24087003), 2023-04-10
Supplement: s1 [file s1]

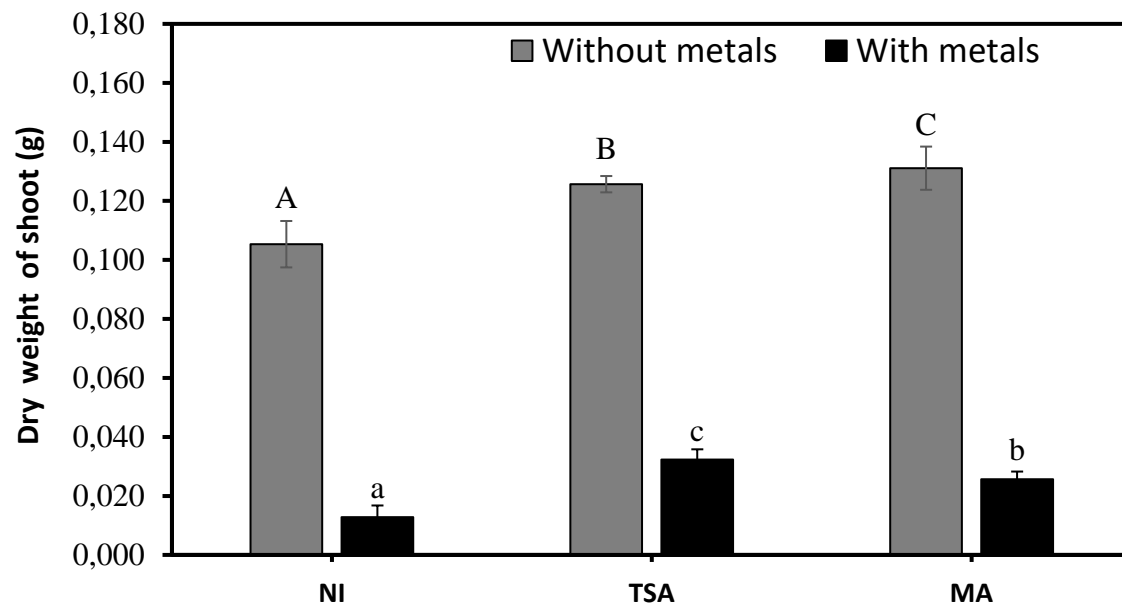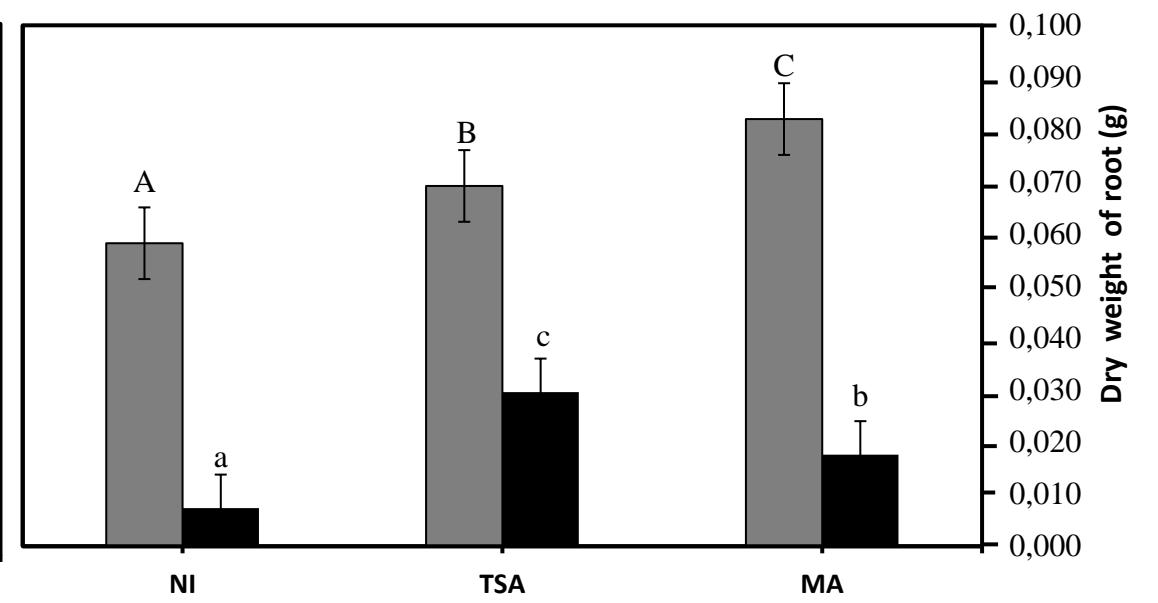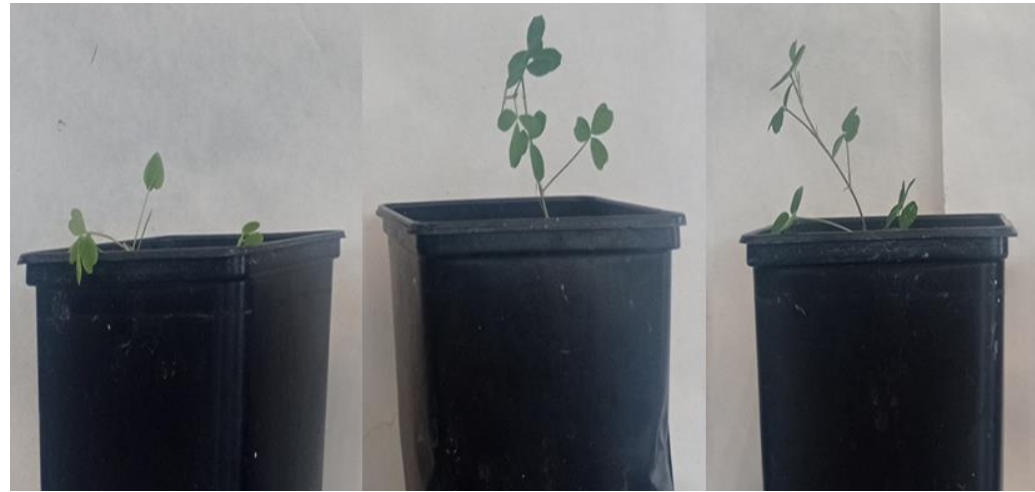

NI

TSA

MA

Statistically significant differences with regard to the non-inoculated control plants at  $p < 0.05$  are indicated by different letters (upper case for the plants grown in the absence of metals and lower case for plants grown in the presence of a mix of metals)

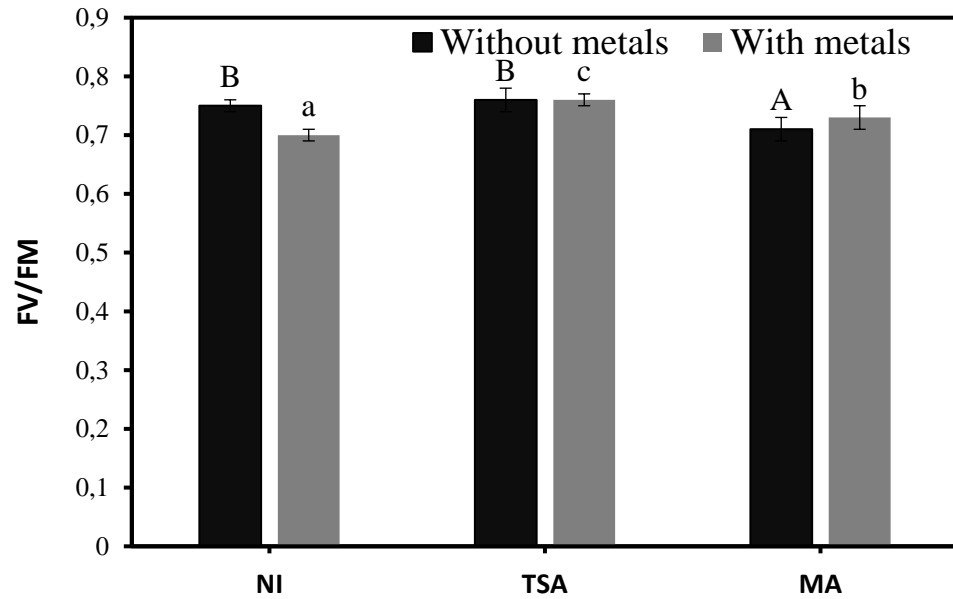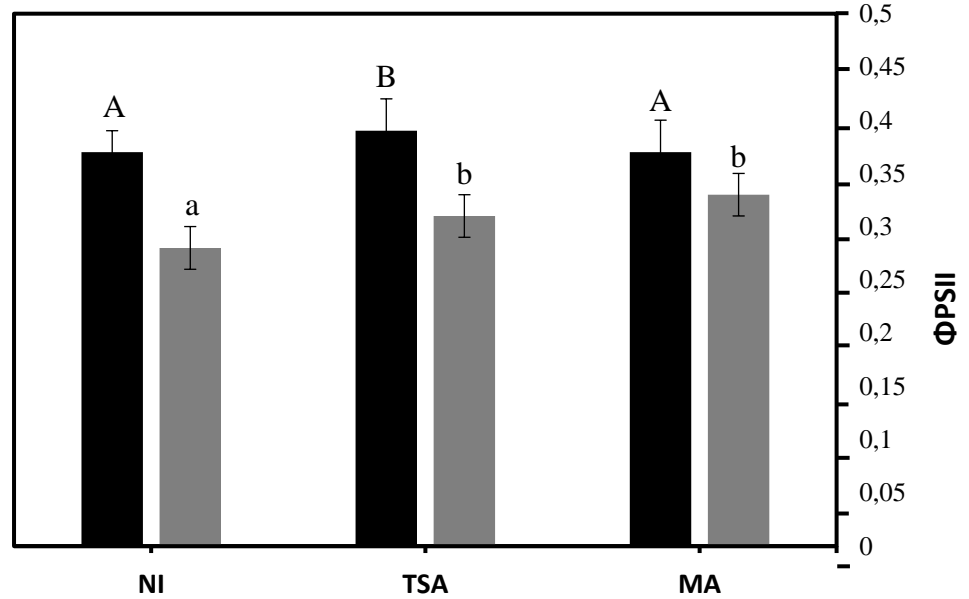

**Table S3. Accumulation of metal/loid in shoots and roots of *M. sativa***

| Strain       | As (mg/Kg)    | Cd (mg/Kg)   | Cu (mg/Kg)    | Zn (mg/Kg)     |
|--------------|---------------|--------------|---------------|----------------|
| <b>Shoot</b> |               |              |               |                |
| NI           | 15.4545±0.17a | 0.3409±0.17a | 5.2272±0.23a  | 28.1818±0.11a  |
| TSA          | 18.2027±0.15b | 1.0228±0.02c | 5.8755±0.21b  | 75.2304±0.08b  |
| MA           | 31.1479±0.17c | 0.8166±0.01b | 10.9659±0.32c | 77.6948±0.17c  |
| <b>Root</b>  |               |              |               |                |
| NI           | 30.9938±0.14a | 1.9996±0.00b | 23.8952±0.67a | 149.4701±0.50b |
| TSA          | 87.6584±0.22c | 3.7638±0.03c | 31.2500±1.11c | 197.1077±0.72c |
| MA           | 61.7466±0.22b | 1.4325±0.01a | 25.0444±0.76b | 94.8429±0.34a  |

Statistically significant differences with regard to the non-inoculated control plants at  $p < 0.05$  are indicated by different letters (upper case for the plants grown in the absence of metals and lower case for plants grown in the presence of a mix of metals)
