# Supplementary material for: A Culturomics-Based Bacterial Synthetic Community for Improving Resilience towards Arsenic and Heavy Metals in the Nutraceutical Plant Mesembryanthemum crystallinum
Source: MDPI journal article supplement (doi:10.3390/ijms24087003), 2023-04-10
Supplement: s1 [file s1]

**Table S1.** Summary of the protocols used for the determination of plant growth promoting properties.

| PGP                      | Medium                                                                                                 | Inoculation                                                                                                                                        | Observation                                                                                                                                                                                                                                                                           | Reference                  |
|--------------------------|--------------------------------------------------------------------------------------------------------|----------------------------------------------------------------------------------------------------------------------------------------------------|---------------------------------------------------------------------------------------------------------------------------------------------------------------------------------------------------------------------------------------------------------------------------------------|----------------------------|
| Phosphate solubilisation | NBRIP agar plates containing $\text{Ca}_3(\text{PO}_4)_2$ as the sole phosphate source                 | 200 $\mu\text{L}$ of bacterial culture were added to a well excavated in the agar. Plates were incubated at 28 °C for 5-7 days                     | The appearance of clear halo around the wells was indicative of P solubilisation. The halo diameter was measured.                                                                                                                                                                     | (Nautiyal, 1998)           |
| Potassium solubilisation | Aleksandrov medium plates containing insoluble K (mica)                                                | 200 $\mu\text{L}$ of bacterial culture were added to a well excavated in the agar. Plates were incubated at 28 °C for 5-7 days                     | The appearance of clear halo around the wells was indicative of K solubilisation. The halo diameter was measured.                                                                                                                                                                     | (Aleksandrov et al., 1967) |
| Nitrogen Fixation        | Medium NFB with no nitrogen source                                                                     | The bacteria were streaked on the plates and incubated at 28 °C for 5-7 days                                                                       | The massive growth of colonies in the plates was indicative of nitrogen's fixation activity.                                                                                                                                                                                          | (Döbereiner, 1980)         |
| Ability to form biofilms | Adhesion to the bottom of 96 wells microtiter plates                                                   | Wells containing TSA medium were inoculated with 5 $\mu\text{L}$ of bacterial cultures in quadruplicate. Plates were incubated at 28 °C for 5 days | After emptying the wells and washing 5 times with water, biofilms were stained with 1% crystal violet for 10 min. After washing again, the dye was solubilized in ethanol:HCl and the absorbance at 595 nm was determined                                                             | O'Toole (2011)             |
| Siderophores production  | CAS (chromo-azuro-S) agar                                                                              | 200 $\mu\text{L}$ of bacterial culture were added to a well excavated in the agar. Plates were incubated at 28 °C for 5-7 days                     | The appearance of a red-orange halo around the well indicated a positive result. The diameter of the halo was measured                                                                                                                                                                | (Schwyn & Neilands, 1986)  |
| Auxins (IAA) Production  | 3 ml of liquid cultures of NB medium (Nutrient Broth, 8 g $\text{l}^{-1}$ ) containing 1 mM tryptophan | Cultures were incubated at 28 °C for 48 h at 200 rpm                                                                                               | The cultures were centrifuged, and the amount of IAA produced was determined in 1 ml of the supernatant by addition of 3 ml Salkowski reagent. The absorbance at 535 nm was registered and the concentration of auxins was calculated using a standard curve made with commercial IAA | (Salkowski, 1885)          |

**Table S2.** Summary of the protocols used for the determination of enzymatic activities.

| Enzymatic activities | Medium                                                            | Inoculation                                                                           | Observation                                                                                                                                                 | Reference                  |
|----------------------|-------------------------------------------------------------------|---------------------------------------------------------------------------------------|-------------------------------------------------------------------------------------------------------------------------------------------------------------|----------------------------|
| Amylase              | Starch agar plates                                                | Bacteria were stricken on the plates. The plates were incubated for 5-7 days at 28 °C | The disappearance of starch around the colonies was revealed by adding lugol (dark blue color)                                                              | Navarro-Torre et al., 2020 |
| DNAase               | DNAase agar                                                       | Bacteria were stricken on the plates. The plates were incubated for 5-7 days at 28 °C | The activity was revealed by adding 10 ml of HCl 1 N on top of the plate. Appearance of clear zone around the colonies                                      | Navarro-Torre et al., 2020 |
| Protease             | Casein agar                                                       | Bacteria were stricken on the plates. The plates were incubated for 5-7 days at 28 °C | The presence of a clear halo around the colony was positive for protease activities.                                                                        | (Prescott & Harley, 2002)  |
| Lipase               | Tween agar                                                        | Bacteria were stricken on the plates. The plates were incubated for 5-7 days at 28 °C | The presence of a precipitate halo around the colonies was positive for lipase activity                                                                     | (Prescott & Harley, 2002)  |
| Cellulase            | Ammonium mineral agar (AMA) containing 1% carboxymethyl cellulose | Bacteria were stricken on the plates. The plates were incubated for 5-7 days at 28 °C | The activity was revealed by adding 1 mg/mL Congo Red for 15 minutes, followed by 1M NaCl for 15 minutes. Appearance of a clear zone against red background | Elbetagy et al. (2000)     |
| Pectinase            | Ammonium mineral agar (AMA) containing 1% pectin                  | Bacteria were stricken on the plates. The plates were incubated for 5-7 days at 28 °C | Pectinase activity was revealed by adding 2% CTAB. The appearance of clear halo around the colonies indicated pectinase activity                            | Elbetagy et al. (2000)     |
| Chitinase            | Mineral medium supplemented with 1.5% colloidal chitin            | Bacteria were stricken on the plates. The plates were incubated for 5-7 days at 28 °C | The appearance of clear halos around the colonies was indicative of chitinase activity                                                                      | Mesa et al. (2015a)        |

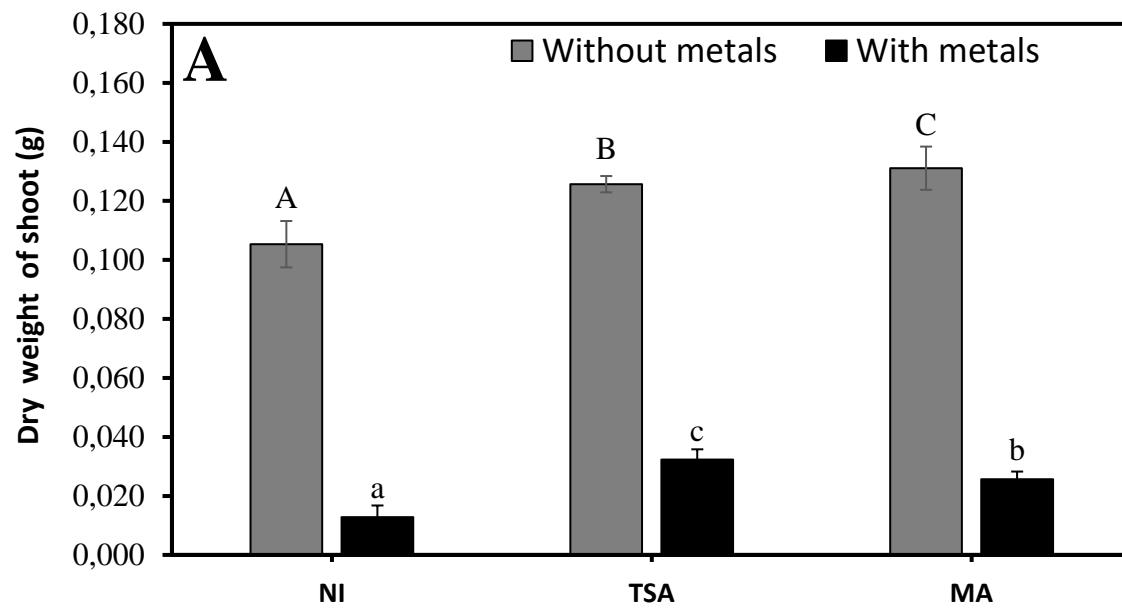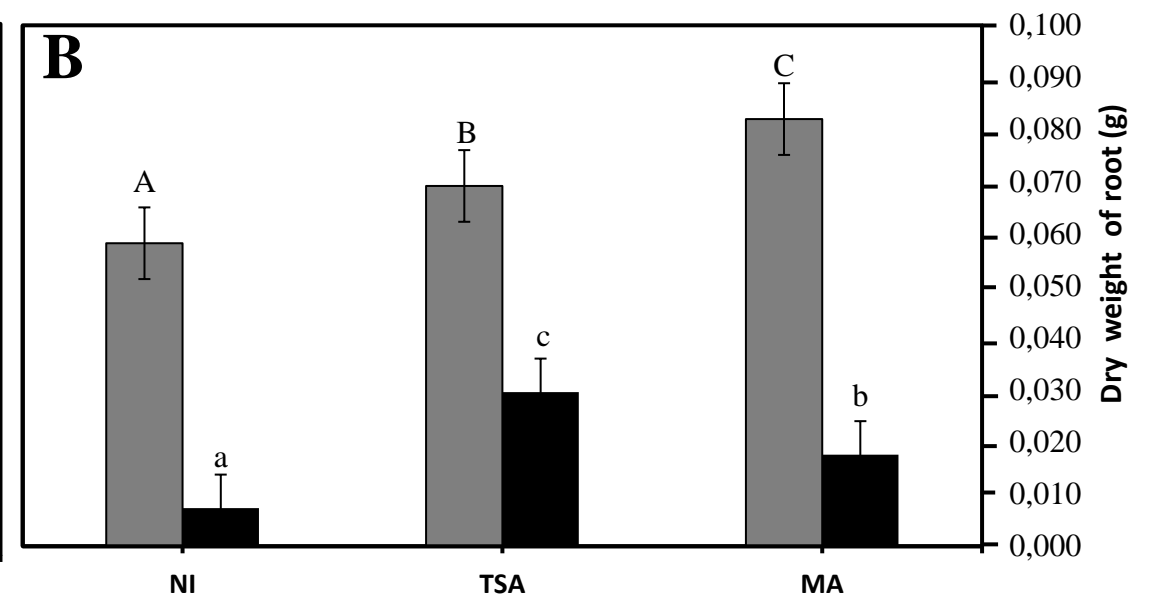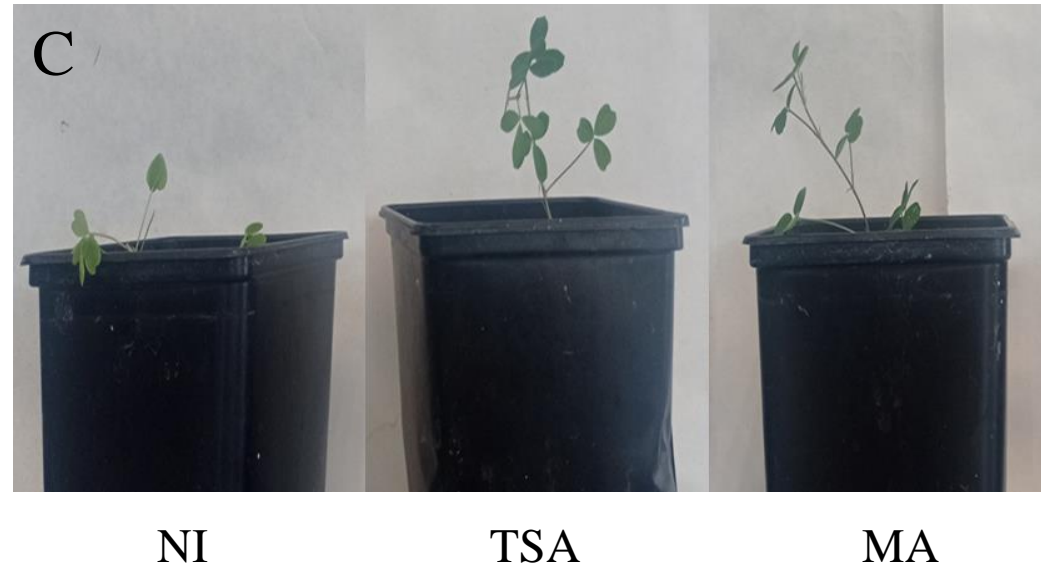

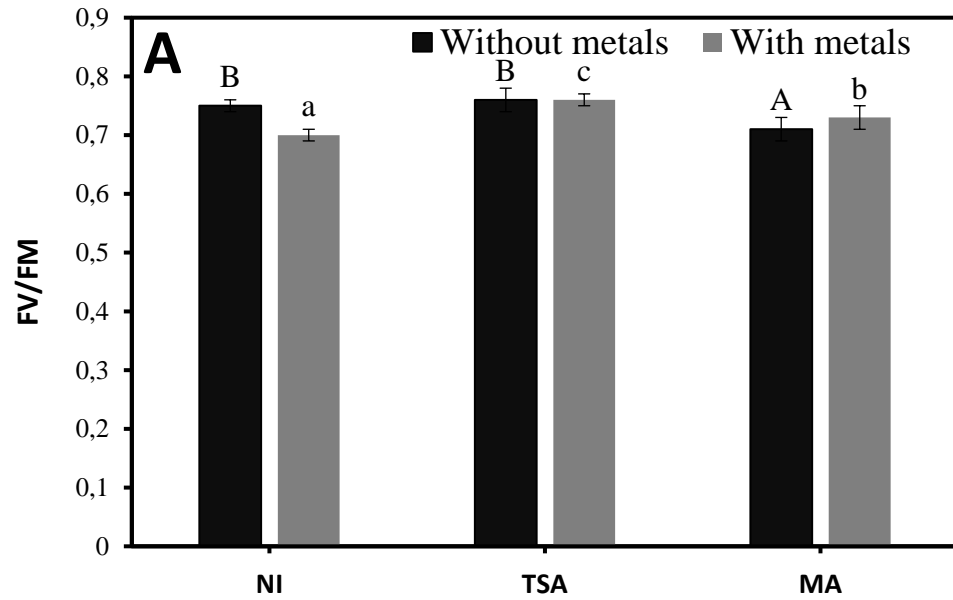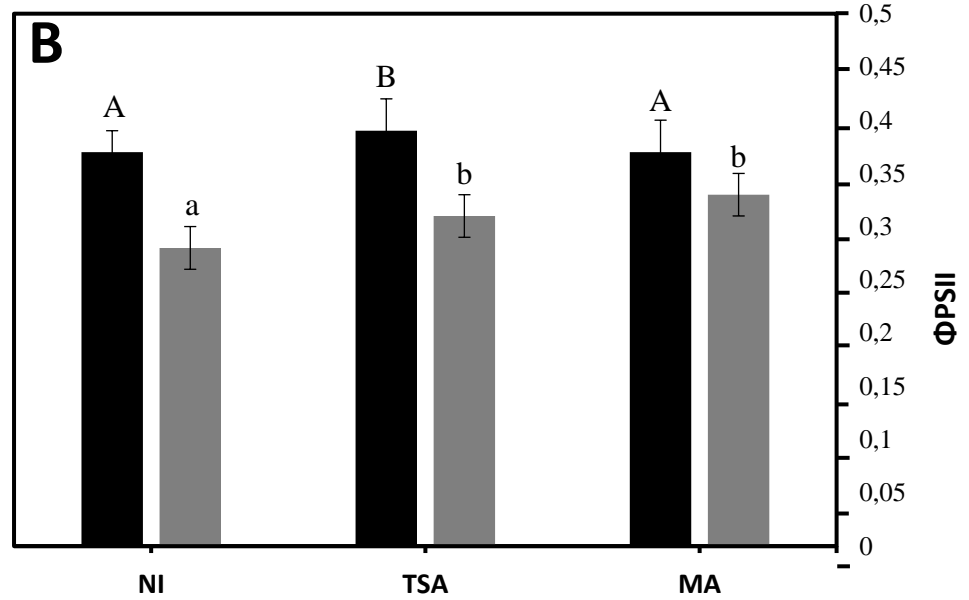

**Table S3. Accumulation of metal/loid in shoots and roots of *M. sativa***

| Strain       | As (mg/Kg)    | Cd (mg/Kg)   | Cu (mg/Kg)    | Zn (mg/Kg)     |
|--------------|---------------|--------------|---------------|----------------|
| <b>Shoot</b> |               |              |               |                |
| NI           | 15.4545±0.17a | 0.3409±0.17a | 5.2272±0.23a  | 28.1818±0.11a  |
| TSA          | 18.2027±0.15b | 1.0228±0.02c | 5.8755±0.21b  | 75.2304±0.08b  |
| MA           | 31.1479±0.17c | 0.8166±0.01b | 10.9659±0.32c | 77.6948±0.17c  |
| <b>Root</b>  |               |              |               |                |
| NI           | 30.9938±0.14a | 1.9996±0.00b | 23.8952±0.67a | 149.4701±0.50b |
| TSA          | 87.6584±0.22c | 3.7638±0.03c | 31.2500±1.11c | 197.1077±0.72c |
| MA           | 61.7466±0.22b | 1.4325±0.01a | 25.0444±0.76b | 94.8429±0.34a  |
